# Supplementary material for: Graphitic carbon nitride supported silver nanoparticles (AgNPs/g-C3N4): synthesis and photocatalytic behavior in the degradation of 2,4-dichlorophenoxyacetic acid
Source: Royal Society of Chemistry journal article supplement (doi:10.1039/d4ra02658f), 2024-01-01
Supplement: d4ra02658f1.pdf [file d4ra02658f1.pdf]

### SUPPORTING INFORMATION

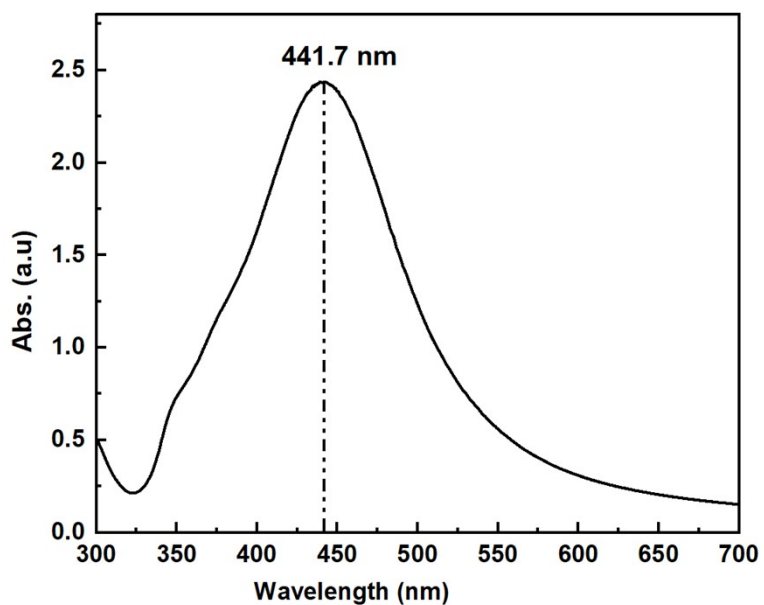

Fig. S1 UV-vis absorption spectrum of AgNPs in solution

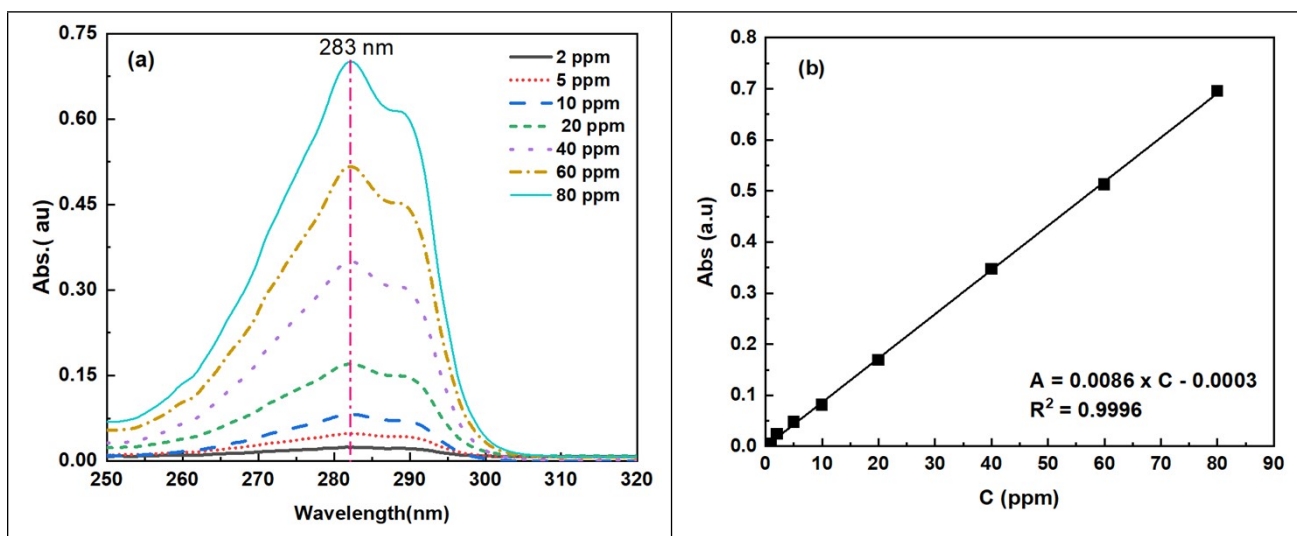

Fig. S2 (a) UV-vis spectra of 2,4- D standard aqueous solution; (b) calibration curve and fitted linear equation for 2,4-D at  $\lambda = 283$  nm

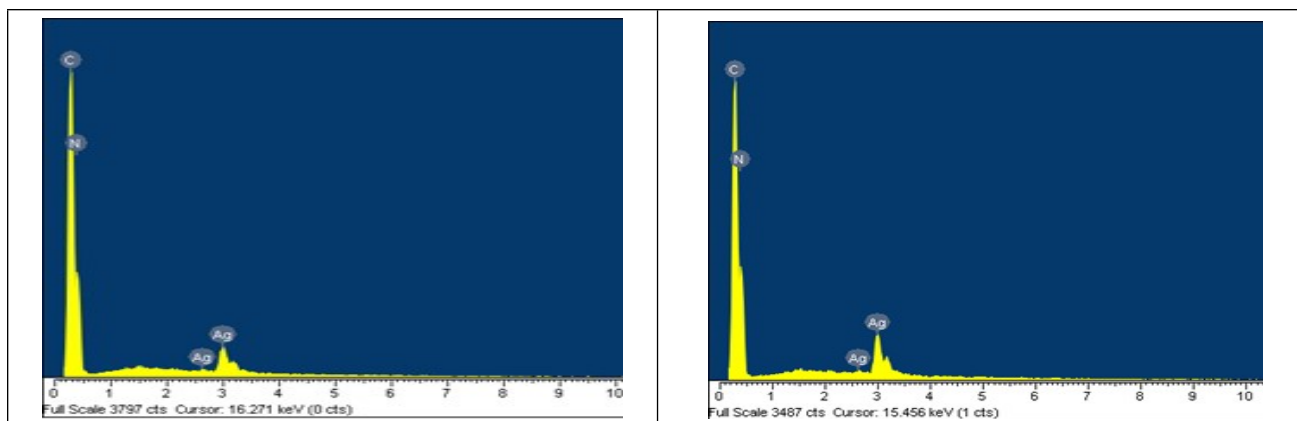

**Fig. S3** EDX spectra of 3 wt% AgNPs/g-C<sub>3</sub>N<sub>4</sub> (a) and 5 wt% AgNPs/g-C<sub>3</sub>N<sub>4</sub> (b)

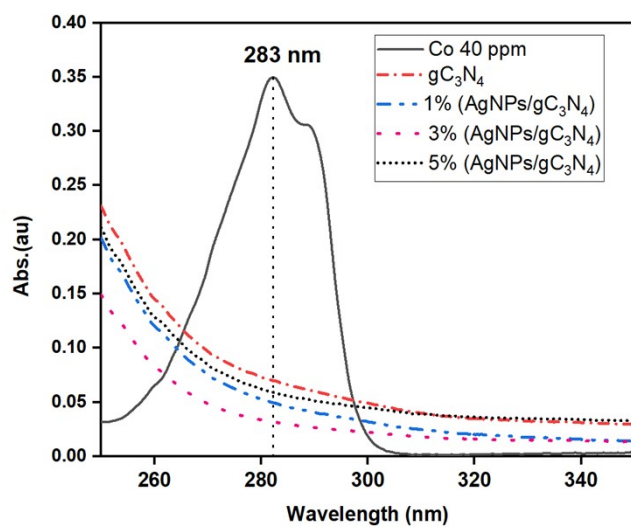

**Fig. S4.** UV-Vis spectra of 2,4-D solutions before adsorption and photocatalysis and after 180 min of illumination with 1 wt%, 3 wt% and 5 wt% AgNPs/g-C<sub>3</sub>N<sub>4</sub>

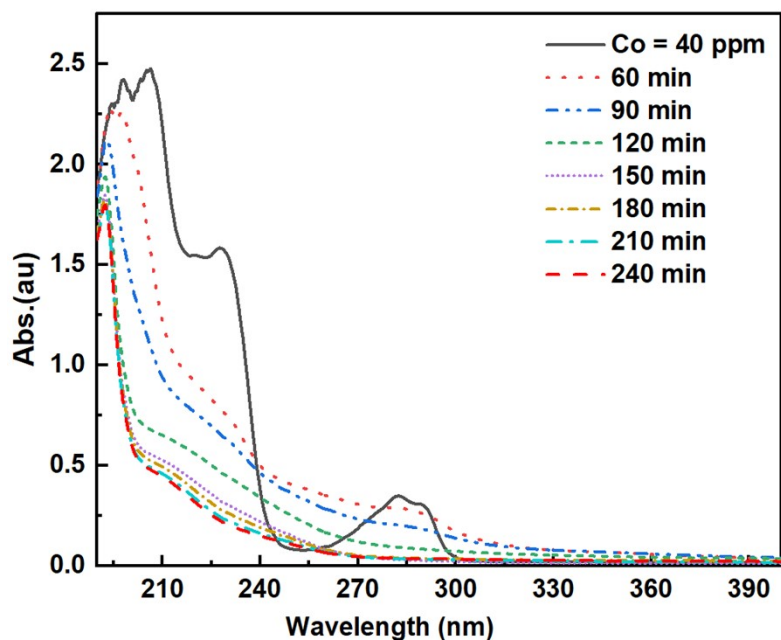

**Fig. S5.** UV-Vis spectra of 2,4-D solutions mixed with 3 wt% AgNPs/g-C<sub>3</sub>N<sub>4</sub> at irradiation times ranging from 0 to 240 min

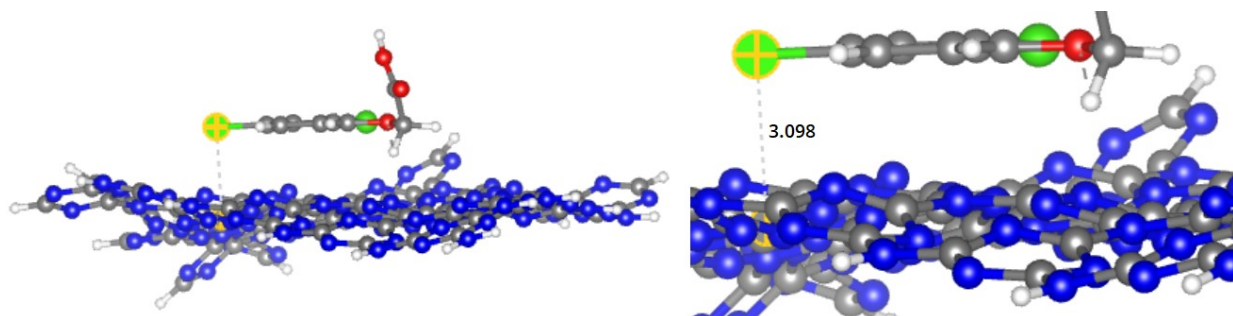

**Figure S6.** Optimized configuration of 2,4-D/g-C<sub>3</sub>N<sub>4</sub>

(color codes: grey - C; dark blue - N; white - H; green - Cl; red - O; all key distances are in Å)

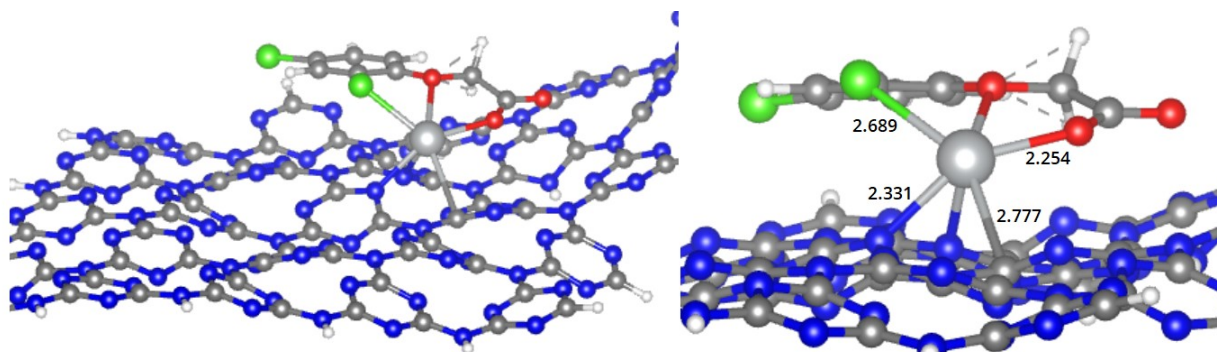

**Figure S7.** The optimized configuration of 2,4-D/g-C<sub>3</sub>N<sub>4</sub> 2,4-D/Ag-g-C<sub>3</sub>N<sub>4</sub>

(color codes: grey - C; dark blue - N; white - H; green - Cl; red - O; all key distances are in Å)

**Table S1. Calculated parameters for optimized adsorption configurations of 2,4-D on g-C<sub>3</sub>N<sub>4</sub> and Ag/g-C<sub>3</sub>N<sub>4</sub>**

| Parameter                               | 2,4-D/g-C <sub>3</sub> N <sub>4</sub> | 2,4-D on Ag/g-C <sub>3</sub> N <sub>4</sub>    |
|-----------------------------------------|---------------------------------------|------------------------------------------------|
| E <sub>ads</sub> , kJ mol <sup>-1</sup> | -95,9                                 | -271,3                                         |
| d <sub>min</sub> , Å                    | 3,098                                 | 2,254 (Ag-O)                                   |
| q(2,4-D), e                             | -0,012                                | -0,243                                         |
| q(Ag), e                                | -                                     | +0,241                                         |
| Bond order (2,4-D-adsorbent)            | 0,000                                 | 0,780 (Ag-O: 0,377; Ag-O: 0,151; Ag-Cl: 0,252) |
